# Supplementary material
Source: PubMed Central journal article supplement (PMC11029097)
Supplement: 262_2014_1640_MOESM1_ESM.pdf [file 262_2014_1640_MOESM1_ESM.pdf]

Supplementary Tables

Supplementary Table 1. Dose Limiting Toxicity Criteria

| Toxicity                                                  | DLT definition                                                                                                                              |
|-----------------------------------------------------------|---------------------------------------------------------------------------------------------------------------------------------------------|
| Hematologic                                               | Grade 3 or febrile neutropenia as per NCI Common Toxicity Criteria for Adverse Events (CTCAE) version 3.0                                   |
| Allergic reaction/hypersensitivity (including drug fever) | ≥Grade 2 as per NCI Common Toxicity Criteria for Adverse Events (CTCAE) version 3.0, and asymptomatic bronchospasm or generalized urticaria |
| Injection site reaction/extravasation changes             | ≥ Grade 3 as per NCI Common Toxicity Criteria for Adverse Events (CTCAE) version 3.0                                                        |
| Other non-hematologic                                     | ≥Grade 3 as per NCI Common Toxicity Criteria for Adverse Events (CTCAE) version 3.0                                                         |

Supplementary Table 2. Discontinuation of Dosing in Individual Patients.

| → Use Common Terminology Criteria for Adverse Events (CTCAE) v3.0 unless otherwise specified ← |                                                   |                              |                                                 |
|------------------------------------------------------------------------------------------------|---------------------------------------------------|------------------------------|-------------------------------------------------|
| CTCAE CATEGORY                                                                                 | ADVERSE EVENT                                     | AGENT                        | TREATMENT ADJUSTMENT or OTHER ACTION            |
| ALLERGY/<br>IMMUNOLOGY                                                                         | ≥Grade 2 allergic reaction/hypersensitivity       | All drugs used in this study | Discontinue vaccinations and begin observation. |
|                                                                                                | ≥Grade 2 autoimmune reaction (excluding vitiligo) |                              | Discontinue vaccinations and begin observation. |
| ALL OTHERS                                                                                     | Grade 3 (excluding alopecia)                      | All drugs used in this study | Discontinue vaccinations and begin observation. |
